# Supplementary material for: Lateral transduction is inherent to the life cycle of the archetypical Salmonella phage P22
Source: PubMed Central journal article supplement (PMC8575938; doi:10.1038/s41467-021-26520-4), 2021-11-08
Supplement: 41467_2021_26520_MOESM1_ESM.pdf [file 41467_2021_26520_MOESM1_ESM.pdf]

**Supplementary Tables.**

**Table S1. Statistical values.**

| <b>Figure 4a</b>                   | <b><i>p</i> value</b> |
|------------------------------------|-----------------------|
| HDR                                | 0.0009                |
| HD+1                               | < 0.0001              |
| HD+2                               | < 0.0001              |
| HD+3                               | 0.0003                |
| HD+4                               | < 0.0001              |
| HD+5                               | < 0.0001              |
| HD+6                               | 0.0002                |
| HD+7                               | 0.0006                |
| HD+8                               | 0.0006                |
| HD+9                               | 0.0024                |
| HD+10                              | 0.0009                |
| HD+11                              | 0.0029                |
| HD+12                              | 0.0266                |
| <b>Figure 4b</b>                   | <b><i>p</i> value</b> |
| HDR                                | 0.0002                |
| HD+1                               | < 0.0001              |
| HD+2                               | 0.0002                |
| HD+3                               | 0.0001                |
| HD+4                               | 0.0014                |
| HD+5                               | < 0.0001              |
| HD+6                               | 0.0001                |
| HD+7                               | 0.0023                |
| HD+8                               | 0.0005                |
| HD+9                               | 0.0081                |
| HD+10                              | 0.0041                |
| <b>Figure 5a. Lateral transfer</b> | <b><i>p</i> value</b> |
| 0-30                               | 0.9974                |
| 0-60                               | 0.0899                |
| 0-90                               | < 0.0001              |
| 0-120                              | < 0.0001              |
| 0-150                              | < 0.0001              |
| 0-180                              | < 0.0001              |
| 0-210                              | < 0.0001              |
| 0-240                              | < 0.0001              |
| 0- -                               | < 0.0001              |
| <b>Figure 5b. Phage titre</b>      | <b><i>p</i> value</b> |
| 0-30                               | 0.9975                |
| 0-60                               | 0.9920                |
| 0-90                               | 0.9101                |
| 0-120                              | 0.1489                |
| 0-150                              | 0.0017                |

|       |          |
|-------|----------|
| 0-180 | < 0.0001 |
| 0-210 | < 0.0001 |
| 0-240 | < 0.0001 |
| 0- -  | < 0.0001 |

| <b>Figure S5.<br/>qPCR EXCISION</b> | <b>p value</b> |
|-------------------------------------|----------------|
| P22 0-30                            | >0.9999        |
| P22 0-60                            | 0,1118         |
| P22 0-90                            | 0,0405         |
| P22 ts 0-30                         | 0,1916         |
| P22 ts 0-60                         | 0,6757         |
| P22 ts 0-90                         | >0.9999        |
| P22 $\Delta pri$ 0-30               | >0.9999        |
| P22 $\Delta pri$ 0-60               | 0,7658         |
| P22 $\Delta pri$ 0-90               | 0,2902         |
| ES18 0-60                           | 0,6209         |
| ES18 0-90                           | 0,0258         |
| ES18 0-120                          | 0,0033         |

| <b>Figure S5.<br/>qPCR CIRCULARISATION</b> | <b>p value</b> |
|--------------------------------------------|----------------|
| P22 0-30                                   | >0.9999        |
| P22 0-60                                   | 0,5923         |
| P22 0-90                                   | <0.0001        |
| P22 ts 0-30                                | 0,9749         |
| P22 ts 0-60                                | 0,3107         |
| P22 ts 0-90                                | 0,8334         |
| ES18 0-60                                  | 0,9989         |
| ES18 0-90                                  | 0,0003         |
| ES18 0-120                                 | <0.0001        |

| <b>Figure S7</b> | <b>p value</b> |
|------------------|----------------|
| HD+1             | 0.1760         |
| HD+2             | 0.2911         |
| HD+3             | 0.0741         |
| HD+4             | 0.8390         |
| HD+5             | 0.1275         |
| HD+6             | 0.4479         |
| HD+7             | 0.5348         |
| HD+8             | 0.0677         |
| HD+9             | 0.6282         |
| HD+10            | 0.9924         |
| HD+11            | 0.1713         |
| HD+12            | 0.7911         |

| <b>Figure S8a</b> | <b><i>p</i> value</b> |
|-------------------|-----------------------|
| HD+1              | 0.0207                |
| HD+2              | 0.0131                |

| <b>Figure S8b</b> | <b><i>p</i> value</b> |
|-------------------|-----------------------|
| HD+1              | 0.0013                |
| HD+2              | 0.0009                |

| <b>Figure S9</b>        | <b><i>p</i> value</b> |
|-------------------------|-----------------------|
| HD+1                    | 0.0008                |
| HD+2                    | 0.0023                |
| HD+4                    | 0.0082                |
| <i>tetM<sup>G</sup></i> | 0.9364                |

| <b>Figure S10. P22 LT</b> | <b><i>p</i> value</b> |
|---------------------------|-----------------------|
| <i>wt-Δint</i>            | 0.0003                |
| <i>wt-Δxis</i>            | 0.0002                |
| <i>wt-Δint-xis</i>        | 0.0002                |

| <b>Figure S10. P22 titre</b> | <b><i>p</i> value</b> |
|------------------------------|-----------------------|
| <i>wt-Δint</i>               | < 0.0001              |
| <i>wt-Δxis</i>               | < 0.0001              |
| <i>wt-Δint-xis</i>           | < 0.0001              |

| <b>Figure S10. ES18 LT</b> | <b><i>p</i> value</b> |
|----------------------------|-----------------------|
| <i>wt-Δint</i>             | 0.0136                |
| <i>wt-Δxis</i>             | 0.0335                |
| <i>wt-Δint-xis</i>         | 0.0434                |

| <b>Figure S10. ES18 titre</b> | <b><i>p</i> value</b> |
|-------------------------------|-----------------------|
| <i>wt-Δint</i>                | < 0.0001              |
| <i>wt-Δxis</i>                | < 0.0001              |
| <i>wt-Δint-xis</i>            | < 0.0001              |

**Table S2. Strains used in this study.**

| Strain               | Description                                                                             | Reference |
|----------------------|-----------------------------------------------------------------------------------------|-----------|
| <i>E. coli</i> DC10B | K-12-derivative cloning strain; <i>dam</i> <sup>+</sup> <i>Ddcm DhsdRMS endA1 recA1</i> | 1         |
| VE18590              | <i>E. faecalis</i> V583 derivative. Non-lysogenic, EfCIV583-negative.                   | 2         |
| VE18562              | <i>E. faecalis</i> V583 derivative. fp1 lysogen, EfCIV583-negative.                     | 2         |
| JP18938              | LT2 ΔFels-1 ΔGifsy-2 ΔGifsy-1 ΔFels-2                                                   | This work |
| JP22117              | SV1208 ΔFels-1                                                                          | This work |
| JP18983              | JP18938 P22 lysogen                                                                     | This work |
| JP18985              | JP18938 ES18 lysogen                                                                    | This work |
| JP22119              | JP22117 P22 <i>tsc29</i> lysogen                                                        | This work |
| JP20460              | JP18938 Δ <i>rfbP-rfbB</i> :: <i>KmR</i>                                                | This work |
| JP20590              | JP18938 P22 lysogen Δ <i>int</i>                                                        | This work |
| JP20591              | JP18938 P22 lysogen Δ <i>xis</i>                                                        | This work |
| JP20592              | JP18938 P22 lysogen Δ <i>int-xis</i>                                                    | This work |
| JP20593              | JP18938 P22 lysogen Δ <i>orf12</i>                                                      | This work |
| JP20595              | JP18938 ES18 lysogen Δ <i>int</i>                                                       | This work |
| JP20596              | JP18938 ES18 lysogen Δ <i>xis</i>                                                       | This work |
| JP20597              | JP18938 ES18 lysogen Δ <i>int-xis</i>                                                   | This work |
| JP19020              | JP18938 Δ <i>attB</i> P22                                                               | This work |
| JP22118              | JP22117 Δ <i>attB</i> P22                                                               | This work |
| JP19086              | JP19020 <i>gpt</i> ΩTetA (6 kb upstream P22 <i>attB</i> )                               | This work |
| JP19087              | JP19020 STM0331ΩTetA (6 kb downstream P22 <i>attB</i> , HF1)                            | This work |
| JP19088              | JP19020 <i>prpR</i> ΩTetA (47 kb downstream P22 <i>attB</i> , HF2)                      | This work |
| JP19089              | JP19020 <i>malZ</i> ΩTetA (88 kb downstream P22 <i>attB</i> , HF3)                      | This work |
| JP19090              | JP19020 <i>yajG</i> ΩTetA (130 kb downstream P22 <i>attB</i> , HF4)                     | This work |
| JP19091              | JP19020 <i>ybaN</i> ΩTetA (170 kb downstream P22 <i>attB</i> , HF5)                     | This work |
| JP19092              | JP19020 <i>ybbV</i> ΩTetA (213 kb downstream P22 <i>attB</i> , HF6)                     | This work |
| JP19093              | JP19020 STM0557ΩTetA (246 kb downstream P22 <i>attB</i> , HF7)                          | This work |
| JP19094              | JP19020 <i>ahpF</i> ΩTetA (304 kb downstream P22 <i>attB</i> , HF8)                     | This work |
| JP19095              | JP19020 <i>ybeL</i> ΩTetA (348 kb downstream P22 <i>attB</i> , HF9)                     | This work |
| JP19096              | JP19020 STM0699ΩTetA (392 kb downstream P22 <i>attB</i> , HF10)                         | This work |
| JP19097              | JP19020 <i>nei</i> ΩTetA (425 kb downstream P22 <i>attB</i> , HF11)                     | This work |
| JP19098              | JP19020 <i>modF</i> ΩTetA (474 kb downstream P22 <i>attB</i> , HF12)                    | This work |
| JP20469              | JP18983 <i>gpt</i> ΩTetA (6 kb upstream P22 <i>attB</i> )                               | This work |
| JP20470              | JP18983 STM0331ΩTetA (6 kb downstream P22 <i>attB</i> , HF1)                            | This work |
| JP20471              | JP18983 <i>prpR</i> ΩTetA (47 kb downstream P22 <i>attB</i> , HF2)                      | This work |
| JP20472              | JP18983 <i>malZ</i> ΩTetA (88 kb downstream P22 <i>attB</i> , HF3)                      | This work |
| JP20473              | JP18983 <i>yajG</i> ΩTetA (130 kb downstream P22 <i>attB</i> , HF4)                     | This work |
| JP20474              | JP18983 <i>ybaN</i> ΩTetA (170 kb downstream P22 <i>attB</i> , HF5)                     | This work |
| JP20475              | JP18983 <i>ybbV</i> ΩTetA (213 kb downstream P22 <i>attB</i> , HF6)                     | This work |
| JP20476              | JP18983 STM0557ΩTetA (246 kb downstream P22 <i>attB</i> , HF7)                          | This work |
| JP20477              | JP18983 <i>ahpF</i> ΩTetA (304 kb downstream P22 <i>attB</i> , HF8)                     | This work |
| JP20478              | JP18983 <i>ybeL</i> ΩTetA (348 kb downstream P22 <i>attB</i> , HF9)                     | This work |
| JP20479              | JP18983 STM0699ΩTetA (392 kb downstream P22 <i>attB</i> , HF10)                         | This work |
| JP20480              | JP18983 <i>nei</i> ΩTetA (425 kb downstream P22 <i>attB</i> , HF11)                     | This work |
| JP20481              | JP18983 <i>modF</i> ΩTetA (474 kb downstream P22 <i>attB</i> , HF12)                    | This work |
| JP21928              | JP22118 <i>gpt</i> ΩTetA (6 kb downstream P22 <i>attB</i> )                             | This work |
| JP21929              | JP22118 <i>prpR</i> ΩTetA (47 kb downstream P22 <i>attB</i> )                           | This work |
| JP21922              | JP22119 <i>gpt</i> ΩTetA (6 kb downstream P22 <i>attB</i> )                             | This work |
| JP21923              | JP22119 <i>prpR</i> ΩTetA (47 kb downstream P22 <i>attB</i> )                           | This work |
| JP20482              | JP18985 <i>gpt</i> ΩTetA (6 kb upstream P22 <i>attB</i> )                               | This work |
| JP20483              | JP18985 STM0331ΩTetA (6 kb downstream P22 <i>attB</i> , HF1)                            | This work |
| JP20484              | JP18985 <i>prpR</i> ΩTetA (47 kb downstream P22 <i>attB</i> , HF2)                      | This work |
| JP20485              | JP18985 <i>malZ</i> ΩTetA (88 kb downstream P22 <i>attB</i> , HF3)                      | This work |
| JP20487              | JP18985 <i>ybaN</i> ΩTetA (170 kb downstream P22 <i>attB</i> , HF4)                     | This work |
| JP20488              | JP18985 <i>ybbV</i> ΩTetA (213 kb downstream P22 <i>attB</i> , HF5)                     | This work |
| JP20489              | JP18985 STM0557ΩTetA (246 kb downstream P22 <i>attB</i> , HF6)                          | This work |
| JP20490              | JP18985 <i>ahpF</i> ΩTetA (304 kb downstream P22 <i>attB</i> , HF7)                     | This work |
| JP20491              | JP18985 <i>ybeL</i> ΩTetA (348 kb downstream P22 <i>attB</i> , HF8)                     | This work |
| JP20493              | JP18985 <i>nei</i> ΩTetA (425 kb downstream P22 <i>attB</i> , HF9)                      | This work |
| JP20494              | JP18985 <i>modF</i> ΩTetA (474 kb downstream P22 <i>attB</i> , HF10)                    | This work |
| JP19438              | JP20470 Δ <i>rfbP-rfbB</i> :: <i>KmR</i>                                                | This work |
| JP19439              | JP20471 Δ <i>rfbP-rfbB</i> :: <i>KmR</i>                                                | This work |
| JP19440              | JP20472 Δ <i>rfbP-rfbB</i> :: <i>KmR</i>                                                | This work |
| JP19441              | JP20473 Δ <i>rfbP-rfbB</i> :: <i>KmR</i>                                                | This work |

|         |                                                                                                      |           |
|---------|------------------------------------------------------------------------------------------------------|-----------|
| JP19442 | JP20474 $\Delta rfbP$ - $rfbB$ :: <i>KmR</i>                                                         | This work |
| JP19443 | JP20475 $\Delta rfbP$ - $rfbB$ :: <i>KmR</i>                                                         | This work |
| JP19444 | JP20476 $\Delta rfbP$ - $rfbB$ :: <i>KmR</i>                                                         | This work |
| JP19445 | JP20477 $\Delta rfbP$ - $rfbB$ :: <i>KmR</i>                                                         | This work |
| JP19446 | JP20478 $\Delta rfbP$ - $rfbB$ :: <i>KmR</i>                                                         | This work |
| JP19447 | JP20479 $\Delta rfbP$ - $rfbB$ :: <i>KmR</i>                                                         | This work |
| JP19448 | JP20480 $\Delta rfbP$ - $rfbB$ :: <i>KmR</i>                                                         | This work |
| JP19449 | JP20481 $\Delta rfbP$ - $rfbB$ :: <i>KmR</i>                                                         | This work |
| JP21422 | JP19020 Cat marker 6 kb downstream P22 <i>attB</i> + TetA marker 6 kb upstream P22 <i>attB</i>       | This work |
| JP21423 | JP19020 Cat marker 6 kb downstream P22 <i>attB</i> + TetA marker 10 kb up downstream P22 <i>attB</i> | This work |
| JP21424 | JP19020 Cat marker 6 kb downstream P22 <i>attB</i> + TetA marker 29 kb up downstream P22 <i>attB</i> | This work |
| JP21425 | JP19020 Cat marker 6 kb downstream P22 <i>attB</i> + TetA marker 32 kb up downstream P22 <i>attB</i> | This work |
| JP21426 | JP19020 Cat marker 10 kb downstream P22 <i>attB</i> + TetA marker 29 kb upstream P22 <i>attB</i>     | This work |
| JP21427 | JP19020 Cat marker 10 kb downstream P22 <i>attB</i> + TetA marker 32 kb upstream P22 <i>attB</i>     | This work |
| JP21428 | JP19020 Cat marker 15.6 kb downstream P22 <i>attB</i> + TetA marker 29 kb upstream P22 <i>attB</i>   | This work |
| JP21429 | JP19020 Cat marker 15.6 kb downstream P22 <i>attB</i> + TetA marker 32 kb upstream P22 <i>attB</i>   | This work |
| JP21430 | JP19020 Cat marker 29 kb downstream P22 <i>attB</i> + TetA marker 32 kb upstream P22 <i>attB</i>     | This work |
| JP21431 | JP18983 Cat marker 6 kb downstream P22 <i>attB</i> + TetA marker 6 kb upstream P22 <i>attB</i>       | This work |
| JP21432 | JP18983 Cat marker 6 kb downstream P22 <i>attB</i> + TetA marker 10 kb up downstream P22 <i>attB</i> | This work |
| JP21433 | JP18983 Cat marker 6 kb downstream P22 <i>attB</i> + TetA marker 29 kb up downstream P22 <i>attB</i> | This work |
| JP21434 | JP18983 Cat marker 6 kb downstream P22 <i>attB</i> + TetA marker 32 kb up downstream P22 <i>attB</i> | This work |
| JP21435 | JP18983 Cat marker 10 kb downstream P22 <i>attB</i> + TetA marker 29 kb upstream P22 <i>attB</i>     | This work |
| JP21436 | JP18983 Cat marker 10 kb downstream P22 <i>attB</i> + TetA marker 32 kb upstream P22 <i>attB</i>     | This work |
| JP21437 | JP18983 Cat marker 15.6 kb downstream P22 <i>attB</i> + TetA marker 29 kb upstream P22 <i>attB</i>   | This work |
| JP21438 | JP18983 Cat marker 15.6 kb downstream P22 <i>attB</i> + TetA marker 32 kb upstream P22 <i>attB</i>   | This work |
| JP21439 | JP18983 Cat marker 29 kb downstream P22 <i>attB</i> + TetA marker 32 kb upstream P22 <i>attB</i>     | This work |
| JP20600 | JP20590 <i>prpR</i> $\Omega$ TetA (47 kb downstream P22 <i>attB</i> , HF2)                           | This work |
| JP20601 | JP20591 <i>prpR</i> $\Omega$ TetA (47 kb downstream P22 <i>attB</i> , HF2)                           | This work |
| JP20602 | JP20592 <i>prpR</i> $\Omega$ TetA (47 kb downstream P22 <i>attB</i> , HF2)                           | This work |
| JP20605 | JP20595 <i>prpR</i> $\Omega$ TetA (47 kb downstream P22 <i>attB</i> , HF2)                           | This work |
| JP20606 | JP20596 <i>prpR</i> $\Omega$ TetA (47 kb downstream P22 <i>attB</i> , HF2)                           | This work |
| JP20607 | JP20597 <i>prpR</i> $\Omega$ TetA (47 kb downstream P22 <i>attB</i> , HF2)                           | This work |
| JP20757 | JP20602 pJP2534                                                                                      | This work |
| JP21704 | <i>E. coli</i> DC10B pJP2563                                                                         | This work |
| JP21747 | <i>E. coli</i> DC10B pJP2564                                                                         | This work |
| JP21748 | <i>E. coli</i> DC10B pJP2565                                                                         | This work |
| JP21896 | <i>E. coli</i> DC10B pJP2566                                                                         | This work |
| JP21706 | <i>E. coli</i> DC10B pJP2568                                                                         | This work |
| JP21767 | VE18590 <i>ceIA</i> $\Omega$ <i>tetM</i> (12.3 kb upstream of pp1 <i>attB</i> )                      | This work |
| JP21855 | VE18590 EF0370 $\Omega$ <i>tetM</i> (12.3 kb downstream of pp1 <i>attB</i> , HF1)                    | This work |
| JP22112 | VE18590 EF0394 $\Omega$ <i>tetM</i> (40.7 kb downstream of pp1 <i>attB</i> , HF2)                    | This work |
| JP22021 | VE18590 EF0480 $\Omega$ <i>tetM</i> (121.1 kb downstream of pp1 <i>attB</i> , HF4)                   | This work |
| JP21771 | VE18590 EF2276 $\Omega$ <i>tetM</i> (1.87 Mb downstream of pp1 <i>attB</i> )                         | This work |
| JP21768 | VE18562 <i>ceIA</i> $\Omega$ <i>tetM</i> (12.3 kb upstream of pp1 <i>attB</i> )                      | This work |
| JP21856 | VE18562 EF0370 $\Omega$ <i>tetM</i> (12.3 kb downstream of pp1 <i>attB</i> , HF1)                    | This work |
| JP21857 | VE18562 EF0394 $\Omega$ <i>tetM</i> (40.7 kb downstream of pp1 <i>attB</i> , HF2)                    | This work |
| JP22110 | VE18562 EF0480 $\Omega$ <i>tetM</i> (121.1 kb downstream of pp1 <i>attB</i> , HF4)                   | This work |



**Table S3. Oligonucleotides used in this study.**

| <b>Mutagenesis</b>                                        | <b>Primers</b>         | <b>Sequence (5'-3')</b>                                                               |
|-----------------------------------------------------------|------------------------|---------------------------------------------------------------------------------------|
| <b>LT2 <math>\Delta</math>Fels-1</b>                      | <b>LT2-AFels1-1m</b>   | GGGGCACTCCTGGGGCAGTAGATGCCAGTTGTTGATTGAG<br>TATATCTACTGTGTAGGCTGGAGCTGCTTCG           |
|                                                           | <b>LT2-AFels1-2c</b>   | GGCATCATACTGTACACTGTCATATGCCATATATTTAAACGC<br>TAAAAGGGCATATGAATATCCTCCTTA             |
| <b>LT2 <math>\Delta</math>Gifsy-2</b>                     | <b>LT2-AGifsy2-13m</b> | CGCTGGAGTATACCTTGTGTTAGCGATTTATTGAACCCCGATC<br>ACACCTGTGTAGGCTGGAGCTGCTTCG            |
|                                                           | <b>LT2-AGifsy2-14c</b> | GCAAATCGCGCTACGCAGAATGTTTCATCTTTTCAGGCACAA<br>ACGGCCGGTCCATATGAATATCCTCCTTAG          |
| <b>LT2 <math>\Delta</math>Gifsy-1</b>                     | <b>LT2-AGifsy1-1m</b>  | CAAGTAACGAGGCGACATCAAACCTTGAGTTATTAATAAAT<br>GGAGAATAGTGTGTAGGCTGGAGCTGCTTCG          |
|                                                           | <b>LT2-AGifsy1-2c</b>  | GTCCCTGATATGGGCGTGCAGGGTCCGGTGAACCTCCGTCAG<br>GCTGAAGCATATGAATATCCTCCTTA              |
| <b>LT2 <math>\Delta</math>Fels-2</b>                      | <b>LT2-AFels2-1m</b>   | CTTCAAGCTCCATGCTGGTTCGTAAATCCATTATCCGGGCTG<br>ACAGAATGCTGTGTAGGCTGGAGCTGCTTCG         |
|                                                           | <b>LT2-AFels2-2c</b>   | TTCCCTTGAGCATCTTCGGGCGGATCTCGGTAACGGGTGTGT<br>TACCCAGAGCATATGAATATCCTCCTTA            |
| <b>LT2 <math>\Delta</math>attB P22</b>                    | <b>LT2-AattB-1m</b>    | CCTTCTACCCCGTGATTCACCCGCGTGAACACACCCTTCTC<br>ATGTGTAGGCTGGAGCTGCTTCG                  |
|                                                           | <b>LT2-AattB-2c</b>    | GGATACTGCTTATGTTTTGCTAGTTGTGTACCCGAGAGTGTA<br>CCCGGTCCATATGAATATCCTCCTTAG             |
| <b>LT2 <math>\Delta</math>rfbP-<br/>rfbB P22</b>          | <b>LT2-ArfbP-1m</b>    | TTTTACGCAGGCTAATTTATACAATTATTATTCAGTACTTCTC<br>GGTAAGCTTGTGTAGGCTGGAGCTGCTTCG         |
|                                                           | <b>LT2-ArfbB-2c</b>    | TTTATTGGCAAATTAATACCACATTAATACGCCTTATGGA<br>ATAGAAAACATATGAATATCCTCCTTA               |
| <b>tetA marker 6<br/>kb upstream<br/>P22 attB</b>         | <b>LT2-tetA-11m</b>    | TCAGACACGATAAGTCTCCTTGCCGGTGGTCTGAAAAACGT<br>TCTTACAGGCCACAGGGTTCCGCTGTTAATCACTTTACTT |
|                                                           | <b>LT2-tetA-12c</b>    | ACCCGCAGGCCGAGAAAAGTGGTATTCTCAGTCGCATCTCGT<br>AAGAGTTATCAATTCCGCTGGTTATCAAGAGGGTCATTA |
| <b>tetA marker 6<br/>kb<br/>downstream<br/>P22 attB</b>   | <b>LT2-tetA-3m</b>     | GGTTGCGCATTATTCACGGCGGCCGTGGCTAAAACGCCCT<br>GCATCCCCGCGCGGTTAAGGCGCTGTTAATCACTTTACTT  |
|                                                           | <b>LT2-tetA-4c</b>     | AATGCCGTAGCGTTTGCCACCGTTCACAAGATATTGAACCA<br>GTTTCATTGCAGTCTTCTTGGTTATCAAGAGGGTCATTA  |
| <b>tetA marker<br/>47 kb<br/>downstream<br/>P22 attB</b>  | <b>LT2-tetA-6m</b>     | ATTGCATCATAAAAATACCCGCCTGGGTTTCCGGCGGGTAT<br>ATTTATTCCTGGCAACCGGCGCTGTTAATCACTTTACTT  |
|                                                           | <b>LT2-tetA-7c</b>     | GCGTCTGAATGCCTGATGGCGCTACGTTTACTGCAGGCC<br>GTCATCCGGCAAACGGATGGGTTATCAAGAGGGTCATTA    |
| <b>tetA marker<br/>88 kb<br/>downstream<br/>P22 attB</b>  | <b>LT2-tetA-9m</b>     | GCGAGGGAAGACTTAGTTTACCCGCGATTTCCGCGACGGT<br>ATGGATGAATCGTTGAGGCGCGCTGTTAATCACTTTACTT  |
|                                                           | <b>LT2-tetA-10c</b>    | CATTGATAAAAGGCTCGCGAATGCGAGCCTTTTTTATGCGT<br>AAGGTGTTACGAACCACCTGGTTATCAAGAGGGTCATTA  |
| <b>tetA marker<br/>130 kb<br/>downstream<br/>P22 attB</b> | <b>LT2-tetA-13m</b>    | CGTAAATATTGACTTGACATAGGCATCTACAGACCCGGCTT<br>CTGCCGGTCTTGTGTTGCGCTGTTAATCACTTTACTT    |
|                                                           | <b>LT2-tetA-14c</b>    | GCTGATATGTCTCAGGACACCAGTATTCACGATTTTATCAAG<br>CAAACGCCCGTTAATAGGGTTATCAAGAGGGTCATTA   |
| <b>tetA marker<br/>170 kb<br/>downstream<br/>P22 attB</b> | <b>LT2-tetA-15m</b>    | CTGCTGATTTTTATGTGGCGGATACCGGTGATTGATGAAAA<br>GCAACAAAAGCGCTGAAGCCGCTGTTAATCACTTTACTT  |
|                                                           | <b>LT2-tetA-16c</b>    | TGTGCTCGAAAACGGTCAATTTACTGGCTGTGAACGACAA<br>TTGCAACAGCGATTTCGTGTGGTTATCAAGAGGGTCATTA  |
| <b>tetA marker<br/>213 kb<br/>downstream<br/>P22 attB</b> | <b>LT2-tetA-17m</b>    | TCACTTTATATAAAAAGAAAGCAACGCAACGTATTGCTTCAG<br>CTTAAAAATAATTATATCCGCTGTTAATCACTTTACTT  |
|                                                           | <b>LT2-tetA-18c</b>    | GATAACGTTGTTATGGGTTTAGCTATGAGGAACAAATAAATA<br>TAAATAAAGAATTAGTAGGTTATCAAGAGGGTCATTA   |
| <b>tetA marker<br/>246 kb</b>                             | <b>LT2-tetA-19m</b>    | TGTAGGAATCCCCGCCGCCGTTACCCATTGGTGGCGGGG<br>AACATTAATTATACATGAATCGCTGTTAATCACTTTACTT   |

|                                                                      |                                                    |                                                                                                                                                                                     |
|----------------------------------------------------------------------|----------------------------------------------------|-------------------------------------------------------------------------------------------------------------------------------------------------------------------------------------|
| downstream<br>P22 <i>attB</i>                                        | LT2-tetA-20c                                       | CATGGGACGTTAGAACAGGGGCGAGGACAAATGAGAATATT<br>ACGGAATAATTAATAACGGTTATCAAGAGGGTCATTA                                                                                                  |
| <i>tetA</i> marker<br>304 kb<br>downstream<br>P22 <i>attB</i>        | LT2-tetA-25m                                       | GCCTTTGATTATCTGATTTCGCACCAAAATCGCATAAAAAGAA<br>GTAAGCACACCTGCAAGGCGCTGTTAATCACTTTACTT<br>AAACACCGCAGGCCCGAATAGCTTACACTATCGGGCCATTT<br>ACGATGGCCAGTTAACTGGGGTTATCAAGAGGGTCATTA       |
| <i>tetA</i> marker<br>348 kb<br>downstream<br>P22 <i>attB</i>        | LT2-tetA-27m                                       | GTGTGGCCACGATCAGTTCAGCGCAGGCCGTTTGAGCCG<br>TAAGGTTTATTATCGTGAGCCGCTGTTAATCACTTTACTT<br>GAAGAGATCCGCAAACTGGAAGCCCAACTGCACGCTTAACA<br>TGGCGGACGGCAACCGTCCGGTTATCAAGAGGGTCATTA         |
| <i>tetA</i> marker<br>392 kb<br>downstream<br>P22 <i>attB</i>        | LT2-tetA-21m                                       | TGAGAAAGAAGCCGTTGAAATCGTTAGCGAAGTATTGAAAA<br>ACGCCTGATGGGCGATATGCGCTGTTAATCACTTTACTT<br>AGGCCTGATAAGCGCAGCGCCGTTAATACAAAAAGGAGC<br>CGTAAGGCTCCTTTTTCTTCGGTTATCAAGAGGGTCATTA         |
| <i>tetA</i> marker<br>425 kb<br>downstream<br>P22 <i>attB</i>        | LT2-tetA-29m                                       | CGCATTGCCAGAAATAGCCGGAACCGACATCGGCGAGCGG<br>CTATTGCCTGATGGCGCGACCGCTGTTAATCACTTTACTT<br>AGCAGTGGCCCGTTTTATATCAACCTATGCGCCCAACAAC<br>CTTTGTAGGGCTGATAAGCGGTTATCAAGAGGGTCATTA         |
| <i>tetA</i> marker<br>474 kb<br>downstream<br>P22 <i>attB</i>        | LT2-tetA-23m                                       | TATCGACCGTTATTATTCTTAATAAAAGGAGAGTGGTTC<br>CAGAATGGCGCGCGCGCCGCTGTTAATCACTTTACTT<br>AGGGCGAACGTTATAAGTACGTTTCCGGACGATGCAATAAT<br>TAAATGTATTATCAGAATGGGTTATCAAGAGGGTCATTA            |
| <i>cat</i> marker 6<br>kb<br>downstream<br>P22 <i>attB</i>           | LT2-STM0331-cat-<br>1m<br>LT2-STM0331-cat-<br>2c   | GGTTGCGCATTATTCACGGCGGCCGTGGCTAAAACGCCCT<br>GCATCCCCGCGCGGTTAAGGGGCGCGCCTACCTGTGACGG<br>AATGCCGTAGCGTTTGCACCGTTACAAGATATTGAACCA<br>GTTTCATTGCAGTCTTCTTGAATAGGAACCTTCATTTAAATG<br>GC |
| <i>tetA</i> marker<br>10 kb<br>downstream<br>P22 <i>attB</i>         | LT2-stbE-tetA-2c<br>LT2-stbE-tetA-1m               | CTCCTGAGTTTTGATGGGAAATATTCAGGGATACGATCGTAT<br>CCCTGAGGGGTTATCAAGAGGGTCATTA<br>ATCAGCTTAATGCTATTTTTGACAATGGTACATGCTGAGTCT<br>GGCTTGCGCTGTTAATCACTTTACTT                              |
| <i>tetA</i> marker<br>29 kb<br>downstream<br>P22 <i>attB</i>         | LT2-STM0352-<br>tetA-1m<br>LT2-STM0352-<br>tetA-2c | CGTTTTCCCTCTTTACCGCAGCGTGTCGGCCATTCCGCAACG<br>CTGCCGCAGCGCTGTTAATCACTTTACTT<br>CCCGTCAGGAACGCTTGACCTTTCCTTCGTTGTAACGCCTA<br>GCCTTTGCCGGTTATCAAGAGGGTCATTA                           |
| <i>tetA</i> marker<br>32 kb<br>downstream<br>P22 <i>attB</i>         | LT2-STM0355-<br>tetA-1m<br>LT2-STM0355-<br>tetA-2c | CCGTTTTCCCGCCGCGCGAGAGGTAATCGTCAATGGCGAT<br>CGGTCTGGCGCGCTGTTAATCACTTTACTT<br>CTCACGCAAAGAAAAGCGAAGCGTGGCTAGCGTATCGCGA<br>CCGGCCTGTGGTTATCAAGAGGGTCATTA                             |
| <i>cat</i> marker 10<br>kb<br>downstream<br>P22 <i>attB</i>          | LT2-stbE-cat-1m<br>LT2-stbE-cat-2c                 | ATCAGCTTAATGCTATTTTTGACAATGGTACATGCTGAGTCT<br>GGCTTGGGCGCGCCTACCTGTGACGG<br>CTCCTGAGTTTTGATGGGAAATATTCAGGGATACGATCGTAT<br>CCCTGAGGGGAATAGGAACTTCATTTAAATGGC                         |
| <i>cat</i> marker<br>15.6 kb<br>downstream<br>P22 <i>attB</i>        | LT2-stbB-cat-1m<br>LT2-stbB-cat-2c                 | CAACTCCCTAGCGATTGAAAATGGTCTGGCGTTTCAACGCC<br>AGACCGTAGGGCGCGCCTACCTGTGACGG<br>GGGACAGTCGCTGCCACCCTTCAATACGCCGTTTCGTATAA<br>ATAATTGTCGGAATAGGAACTTCATTTAAATGGC                       |
| <i>cat</i> marker 29<br>kb<br>downstream<br>P22 <i>attB</i>          | LT2-STM0352-cat-<br>1m<br>LT2-STM0352-cat-<br>2c   | CGTTTTCCCTCTTTACCGCAGCGTGTCGGCCATTCCGCAACG<br>CTGCCGCAGGGCGCGCCTACCTGTGACGG<br>CCCGTCAGGAACGCTTGACCTTTCCTTCGTTGTAACGCCTA<br>GCCTTTGCCGGAATAGGAACTTCATTTAAATGGC                      |
| P22 $\Delta int$<br>(same<br>primers used<br>for ES18 $\Delta int$ ) | P22-Aint-3m<br>P22-Aint-4c                         | CCCGCTCGTTTTAATGCTGCCCTCCATGCAGTATTAGCGTC<br>ATAGTGTGTAGGCTGGAGCTGCTTCG<br>GAGGAGAAGGCGCATAAGAAGTCGCTGGATGATGACAAGA<br>GTCGGGGTCCATATGAATATCCTCCTTAG                                |
| P22 $\Delta xis$                                                     | P22-Axis-1m                                        | ATGTCATCACCCGCGCTCACCTGGACAGTATGCAGCGGAG<br>ATTGAAGTGCTGTGTAGGCTGGAGCTGCTTCG                                                                                                        |



|                                        |                      |                                                                                |
|----------------------------------------|----------------------|--------------------------------------------------------------------------------|
|                                        | <b>P22-Axis-2c</b>   | GAAACAGCGGAGTAAACATGGAATCACACAGCCTCACACTT<br>GATGAGGCCGGTCCATATGAATATCCTCCTTAG |
| <b>P22 <math>\Delta</math>int-xis</b>  | <b>P22-Aint-3m</b>   | CCCGCTCGTTTTAATGCTGCCCTCCATGCAGTATTAGCGTC<br>ATAGTGTGTAGGCTGGAGCTGCTTCG        |
|                                        | <b>P22-Axis-2c</b>   | GAAACAGCGGAGTAAACATGGAATCACACAGCCTCACACTT<br>GATGAGGCCGGTCCATATGAATATCCTCCTTAG |
| <b>P22 <math>\Delta</math>orf12</b>    | <b>P22-Aorf12-1m</b> | GGTGGCTTGCTGATTGGCGGATTAACACCAACCGCCAGTG<br>ACGTTCTGGCTGTGTAGGCTGGAGCTGCTTCG   |
|                                        | <b>P22-Aorf12-2c</b> | GCGGCTTCCTGATGGATGACAGGCGCTTTACAAGCTCGTCC<br>ATCGCTCTGGGTCCATATGAATATCCTCCTTAG |
| <b>ES18 <math>\Delta</math>xis</b>     | <b>ES18-Axis-1m</b>  | TATGCCATCACCCGCGCTCACGGCGACAGTATGCATCGGA<br>GACTGAAGAGTGTGTAGGCTGGAGCTGCTTCG   |
|                                        | <b>ES18-Axis-2c</b>  | AGCAATAACAATCCTCGCACTCGCGGGGATTTCTTTTATCC<br>GGAGTAACCGGTCCATATGAATATCCTCCTTAG |
| <b>ES18 <math>\Delta</math>int-xis</b> | <b>P22-Aint-3m</b>   | CCCGCTCGTTTTAATGCTGCCCTCCATGCAGTATTAGCGTC<br>ATAGTGTGTAGGCTGGAGCTGCTTCG        |
|                                        | <b>ES18-Axis-2c</b>  | AGCAATAACAATCCTCGCACTCGCGGGGATTTCTTTTATCC<br>GGAGTAACCGGTCCATATGAATATCCTCCTTAG |

| <b>Excision</b>     | <b>Primers</b>     | <b>Sequence (5'-3')</b> |
|---------------------|--------------------|-------------------------|
| <b>P22 and ES18</b> | <b>LT2-attB-1m</b> | TCAGCACGCAGAAATTACATG   |
|                     | <b>LT2-attB-2c</b> | ACGGAATCATTAAACATGATGG  |

| <b>Circularisation</b> | <b>Primers</b>       | <b>Sequence (5'-3')</b> |
|------------------------|----------------------|-------------------------|
| <b>P22</b>             | <b>P22-gtrA-4m</b>   | GTTTTGATCGATACAAGCGATC  |
|                        | <b>P22-int-7c</b>    | CCTGACTGAACATGCTCGAC    |
| <b>ES18</b>            | <b>ES18-orf33-1m</b> | TCATCAACAGTGCGACAGATG   |
|                        | <b>P22-int-7c</b>    | CCTGACTGAACATGCTCGAC    |

| <b>Housekeeping</b> | <b>Primers</b>     | <b>Sequence (5'-3')</b> |
|---------------------|--------------------|-------------------------|
| <b>P22 and ES18</b> | <b>LT2-rapA-1m</b> | CGCTGAGCTGGCGGTTGAAGG   |
|                     | <b>LT2-rapA-2c</b> | TGCCGCGAGCAACATGAAGCG   |

| Plasmid         | Primers         | Sequence (5'-3')                                                                                   | Comment                                                                                        |                   |
|-----------------|-----------------|----------------------------------------------------------------------------------------------------|------------------------------------------------------------------------------------------------|-------------------|
| <b>pBAD18</b>   |                 |                                                                                                    |                                                                                                |                   |
| pJP2534         | P22-int-5mS     | ACGCGTCGACCAAATACTTACGTATTATTCGTG<br>CC                                                            |                                                                                                |                   |
|                 | P22-xis-4cE     | CCGGAATTCATTCTACGACATCGCTAACGC                                                                     |                                                                                                |                   |
| <b>pBT2bgal</b> |                 |                                                                                                    |                                                                                                |                   |
| pJP2563         | pp1-HF-1_FB     | AGTAGGATCCCAAAGTAGGGGCCTTTTCTGC<br>ACCTTTTACAGC                                                    | <i>celA</i> left flank                                                                         |                   |
|                 | pp1-tetM_HF-1_R | CTCAAATTGCGAGATTTGGGTTGCCTTTGTTTC<br>TTGATCAAATTTGAACAAAGGACTGAAACGATA<br>TGTC AATTTTGAAAAATG      |                                                                                                |                   |
|                 | tetM-F          | GATCAAGAAACAAAGGCAACCCAAATCTCGCA<br>ATTTGAG                                                        | <i>tetM</i> cassette                                                                           |                   |
|                 | tetM-RS         | GTCAGTCGACGATCTTGATCATTACTCCATGT<br>ATCTATTGATG                                                    |                                                                                                |                   |
|                 | pp1-HF-1_FB     | AGTAGGATCCCAAAGTAGGGGCCTTTTCTGC<br>ACCTTTTACAGC                                                    | <i>celA</i> left flank- <i>tetM</i><br>fusion                                                  |                   |
|                 | tetM-RS         | GTCAGTCGACGATCTTGATCATTACTCCATGT<br>ATCTATTGATG                                                    |                                                                                                |                   |
|                 | pp1-HF-1_FS     | CATTTTCAA AATTGACATATCGTTTCAGTCCTT<br>TGTTCAAATTTGTCGACTTATACGTTTTGTGCTT<br>CGACTTTTTCAAGGGTTTCTTC | <i>celA</i> right flank                                                                        |                   |
|                 | pp1-HF-1_RH     | TGCAAAGCTTGTTTTCATTTTGTATGTCATCT<br>GAAGTCAAAGATGCG                                                |                                                                                                |                   |
|                 | pJP2564         | pp1-HF1_FB                                                                                         | ATGAGGATCCGGCTACAACCAATTATTAGCTGA<br>CGATTATGTG                                                | EF0370 left flank |
|                 |                 | pp1-tetM_HF1-R                                                                                     | CTCAAATTGCGAGATTTGGGTTGCCTTTGTTTC<br>TTGATCTTAAATTGCTGTAAATTAGGGTTATTG<br>ATATTTTTAAAATAAAAATC |                   |
| tetM-F          |                 | GATCAAGAAACAAAGGCAACCCAAATCTCGCA<br>ATTTGAG                                                        | <i>tetM</i> cassette                                                                           |                   |
| tetM-RS         |                 | GTCAGTCGACGATCTTGATCATTACTCCATGT<br>ATCTATTGATG                                                    |                                                                                                |                   |
| pp1-HF1_FB      |                 | ATGAGGATCCGGCTACAACCAATTATTAGCTGA<br>CGATTATGTG                                                    | EF0370 left flank-<br><i>tetM</i> fusion                                                       |                   |
| tetM-RS         |                 | GTCAGTCGACGATCTTGATCATTACTCCATGT<br>ATCTATTGATG                                                    |                                                                                                |                   |
| pp1-HF1_FX      |                 | AAATATCAATAACCCTAATTTAACAGCAATTTAA<br>TCTAGATTAACAATCACTAAACAGAGGCTTGT<br>CGACAG                   | EF0370 right flank                                                                             |                   |
| pp1-HF1_RNh     |                 | GTCTGCTAGCTGGCGCAAATGTTTATTATCTT<br>GTGAAAAAAC                                                     |                                                                                                |                   |
| pJP2565         |                 | pp1-HF2_FB                                                                                         | TGCAGGATCCACAACAATGCTAGATGCAGTTTT<br>AGATGCGGACTC                                              | EF0370 left flank |
|                 |                 | pp1-tetM_HF2-R                                                                                     | CTCAAATTGCGAGATTTGGGTTGCCTTTGTTTC<br>TTGATCTTAGGCTGAGTGTCTACGATTGTGCT<br>ACCTGAGTAACC          |                   |
|                 | tetM-F          | GATCAAGAAACAAAGGCAACCCAAATCTCGCA<br>ATTTGAG                                                        | <i>tetM</i> cassette                                                                           |                   |
|                 | tetM-RS         | GTCAGTCGACGATCTTGATCATTACTCCATGT<br>ATCTATTGATG                                                    |                                                                                                |                   |
|                 | pp1-HF2_FB      | TGCAGGATCCACAACAATGCTAGATGCAGTTTT<br>AGATGCGGACTC                                                  | EF0370 left flank-<br><i>tetM</i> fusion                                                       |                   |
|                 | tetM-RS         | GTCAGTCGACGATCTTGATCATTACTCCATGT<br>ATCTATTGATG                                                    |                                                                                                |                   |

|                |                    |                                                                                                    |                                          |
|----------------|--------------------|----------------------------------------------------------------------------------------------------|------------------------------------------|
|                | <b>pp1-HF2_FS</b>  | CTCAGGTAGCACAATCGTAGGACACTCAGCCT<br>AAGTCGACTCAGCAATGATAAAAAATAGACGTAA<br>GCAGCTTC                 | EF0370 right flank                       |
|                | <b>pp1-HF2_RNh</b> | ATGTGCTAGCATCATCAAATTGCAAATAACGGC<br>AACCTCTCTC                                                    |                                          |
| <b>pJP2566</b> | <b>pp1-HF4_FB</b>  | ATGTGGATCCCATTTTAGTTAAATCAGTAATTTT<br>CAATATCGAGGG                                                 | EF0480 left flank                        |
|                | <b>pp1-HF4_RS</b>  | GAAGCTATCTTAAAATTTAAAATTAAGTCCG<br>ACCTAAAAAAGCCCCTTCCACTTTTTCTG                                   |                                          |
|                | <b>tetM-FS</b>     | GTACGTCGACGATCAAGAAACAAAGGCAACCC<br>AAATCTCGCAATTTGAG                                              | <i>tetM</i> cassette                     |
|                | <b>tetM-RS</b>     | GTCAGTCGACGATCTTGATCATTACTCCATGT<br>ATCTATTGATG                                                    |                                          |
|                | <b>pp1-HF4_FS</b>  | CAGAAAAAGTGGAAAGGGGCTTTTTTTAGGTC<br>GACTTAGTTAATTTTAAATTTTAAAGATAGCTTC                             | EF0480 right flank                       |
|                | <b>pp1-HF4_RH</b>  | GTCTAAGCTTCTGATTAAACTTTATTATGATGT<br>CATAGTGAAG                                                    |                                          |
| <b>pJP2568</b> | <b>2196839_FB</b>  | ATGTGGATCCGAAATAAGCAATAATCATTGGTC<br>AACGCCTCTC                                                    | EF2276 left flank                        |
|                | <b>2196839_RS</b>  | TAGATTATCGAATATTTTCGAAATTTAATTGAAT<br>GACAAGTCGACTCAAAGTACGAGGCGATACAT<br>TGCTGATAATTTTTTAGAGTATTG |                                          |
|                | <b>tetM-F</b>      | GATCAAGAAACAAAGGCAACCCAAATCTCGCA<br>ATTTGAG                                                        | <i>tetM</i> cassette                     |
|                | <b>tetM-RS</b>     | GTCAGTCGACGATCTTGATCATTACTCCATGT<br>ATCTATTGATG                                                    |                                          |
|                | <b>2196839_FB</b>  | ATGTGGATCCGAAATAAGCAATAATCATTGGTC<br>AACGCCTCTC                                                    | EF2276 left flank-<br><i>tetM</i> fusion |
|                | <b>tetM-RS</b>     | GTCAGTCGACGATCTTGATCATTACTCCATGT<br>ATCTATTGATG                                                    |                                          |
|                | <b>2196839_FSa</b> | TGCAGTCGACTTGTCATTCAATTAATTTTCGAA<br>AATATTCGATAATCTA                                              | EF2276 right flank                       |
|                | <b>2196839_RNh</b> | GTCAGCTAGCTCAGGTGTAGAAAATTTTACTGT<br>AGATTTTGCC                                                    |                                          |

**Table S4. Plasmids used in this study.**

| <b>Plasmid</b>  | <b>Description</b>                                                                                                                                         | <b>Reference</b> |
|-----------------|------------------------------------------------------------------------------------------------------------------------------------------------------------|------------------|
| <b>pKD46</b>    | Amp <sup>R</sup> . Thermosensitive plasmid with Red lambda system                                                                                          | 3                |
| <b>pCP20</b>    | Amp <sup>R</sup> . Thermosensitive plasmid with FLP recombinase                                                                                            | 3                |
| <b>pBAD18</b>   | Amp <sup>R</sup> . Expression vector                                                                                                                       | 4                |
| <b>pBT2βgal</b> | Amp <sup>R</sup> , GN; Cm <sup>R</sup> , GP. Vector for allelic replacement                                                                                | 5                |
| <b>pRN6680</b>  | pBluescriptΩ2.9-kb pMVN6 <i>Sma</i> I- <i>Hind</i> III [ <i>tetA(M)</i> ]; Amp <sup>R</sup> , Tet <sup>R</sup>                                             | 6                |
| <b>pJP2534</b>  | pBAD18 <i>int-xis</i> P22                                                                                                                                  | This work        |
| <b>pJP2563</b>  | pBT2βgal with <i>tetM</i> from pRN6680 positioned between <i>E. faecalis</i> V583 flanking sequences at <i>celA</i> ; Cm <sup>R</sup> , Tet <sup>R</sup>   | This work        |
| <b>pJP2564</b>  | pBT2βgal with <i>tetM</i> from pRN6680 positioned between <i>E. faecalis</i> V583 flanking sequences at <i>EF0370</i> ; Cm <sup>R</sup> , Tet <sup>R</sup> | This work        |
| <b>pJP2565</b>  | pBT2βgal with <i>tetM</i> from pRN6680 positioned between <i>E. faecalis</i> V583 flanking sequences at <i>EF0394</i> ; Cm <sup>R</sup> , Tet <sup>R</sup> | This work        |
| <b>pJP2566</b>  | pBT2βgal with <i>tetM</i> from pRN6680 positioned between <i>E. faecalis</i> V583 flanking sequences at <i>EF0480</i> ; Cm <sup>R</sup> , Tet <sup>R</sup> | This work        |
| <b>pJP2568</b>  | pBT2βgal with <i>tetM</i> from pRN6680 positioned between <i>E. faecalis</i> V583 flanking sequences at <i>EF2276</i> ; Cm <sup>R</sup> , Tet <sup>R</sup> | This work        |

### P22 induction

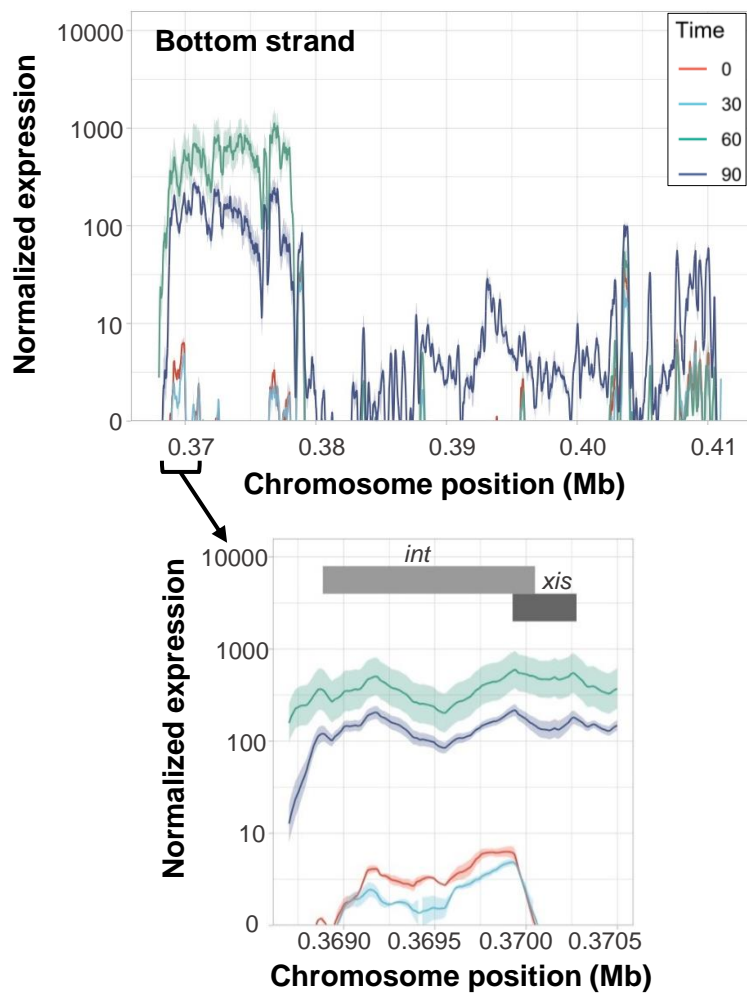

### P22 infection

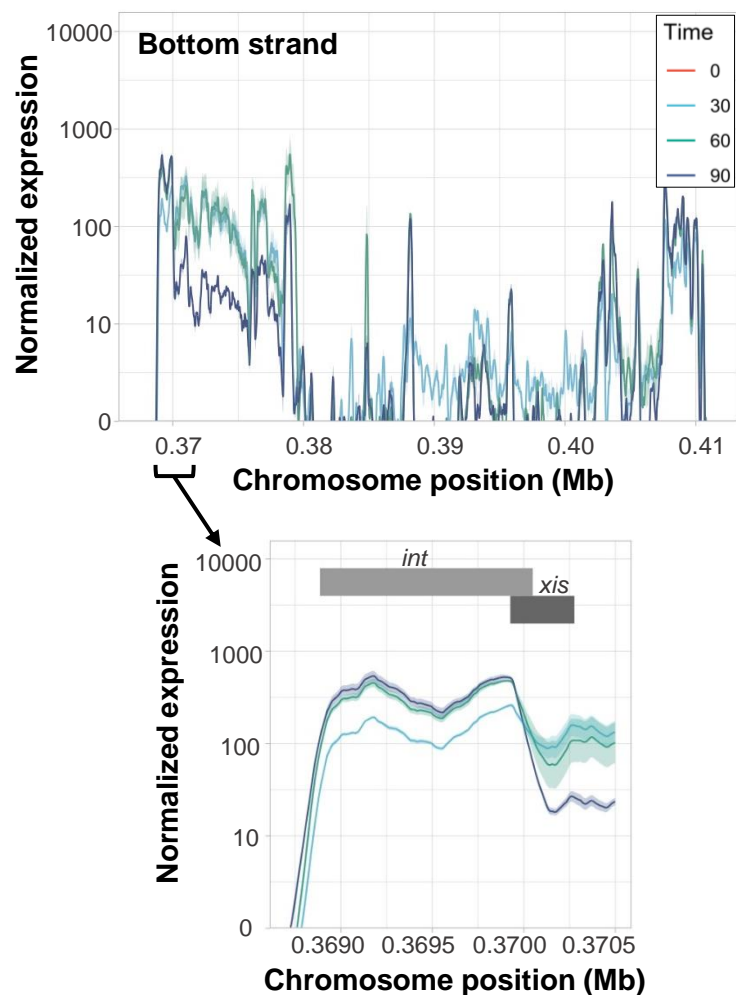

### P22 *tsc<sub>29</sub>* induction

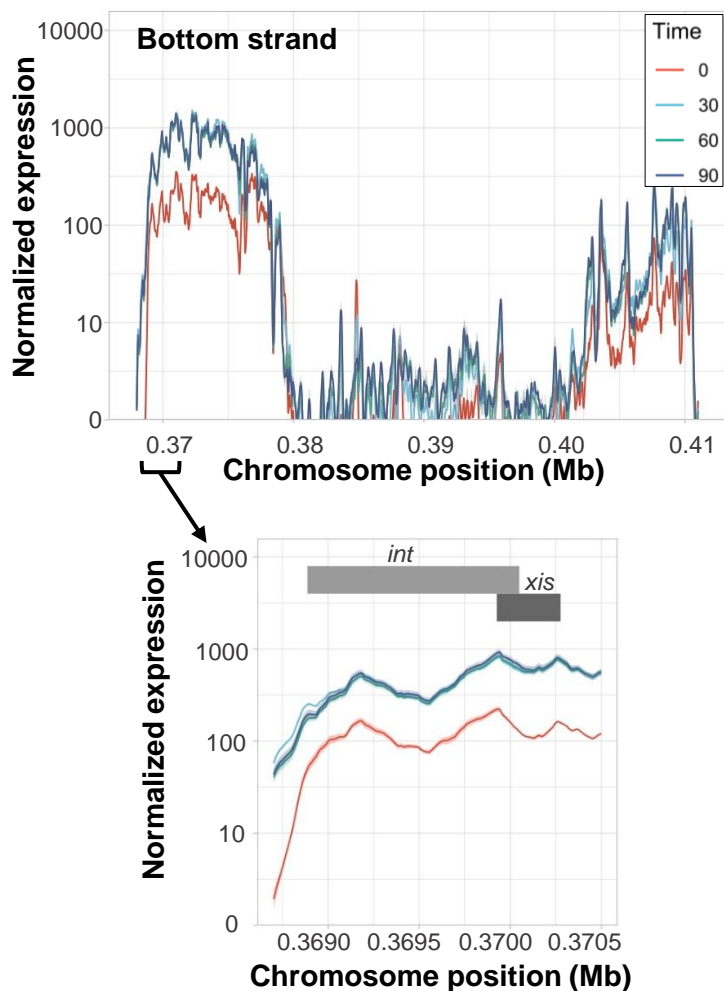

**Figure S1. Detailed analysis of the expression of the *int* and *xis* genes from the different P22 phages. Amplified from Fig. 1.**

**a**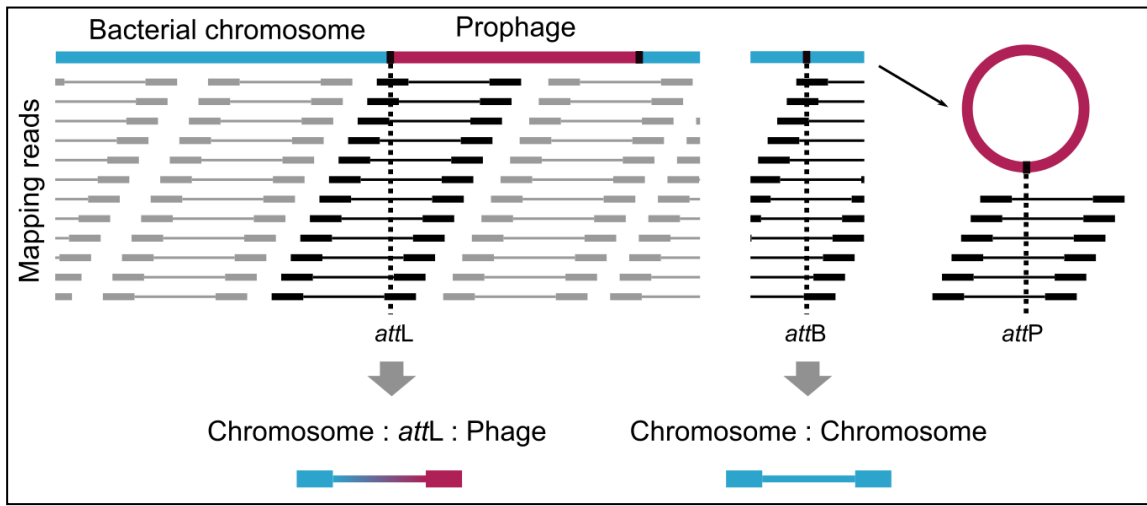**b**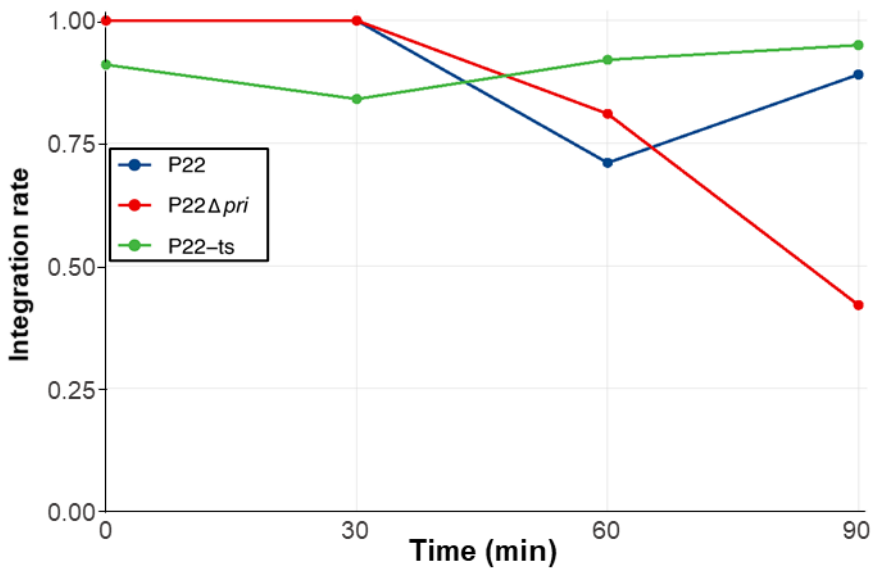**c**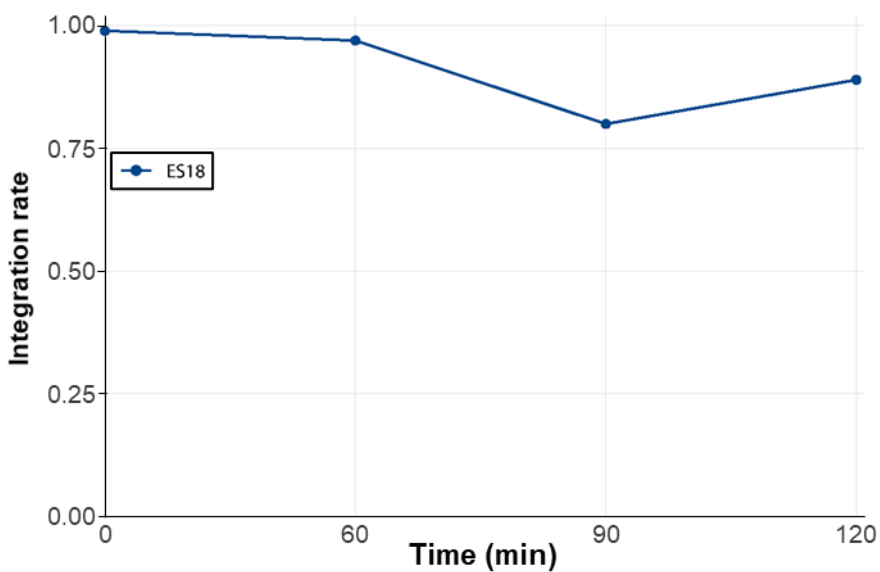

**Figure S2. Prophages excise late from the bacterial chromosome.**

Schematic representation of sequencing reads used for calculation of integration rate **(a)**, *attL* (left site attachment site) and *attB* (bacterial attachment site). To gain insight into the timing of phage excision, the proportion of integrated phage at each timepoint was calculated by dividing the number of chromosome-*attL* reads by the total number of *attL/attB* spanning reads (sum of chromosome-*attL* phage region reads plus reads spanning the *attB* region), obtained from the same sample, for phages P22, P22  $\Delta pri$  and P22 *tsc*<sub>29</sub> **(b)**, and for ES18 **(c)**.

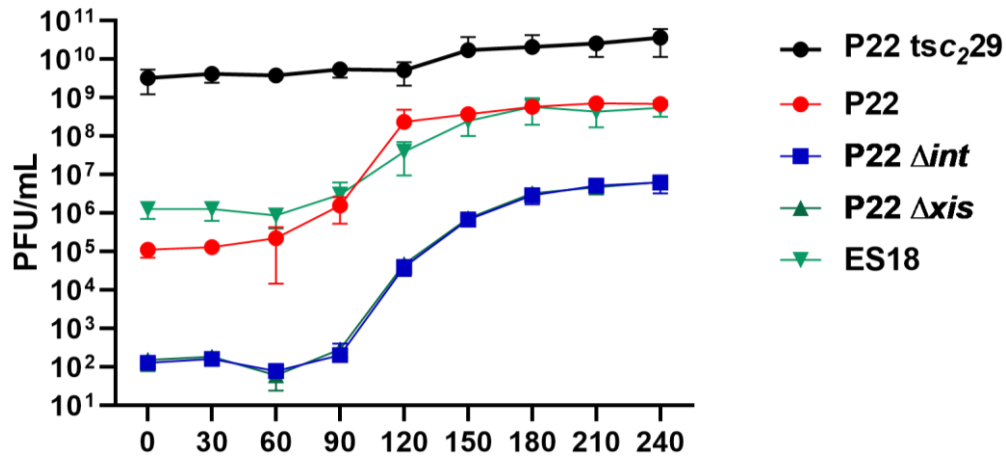

**Figure S3. Phage production over a time course experiment after induction.**

The lysogenic strains for phage P22, P22  $\Delta$ *int*, P22  $\Delta$ *xis*, P22 *tsc*<sub>29</sub> and ES18, were mitomycin C or thermal-induced to activate the prophages, samples were taken before (0) and at different time points (every 30 minutes) after induction and the phage titers evaluated (plaque forming units per millilitre: PFU/mL). The means and standard deviations from three independent experiments are presented ( $n=3$ ).

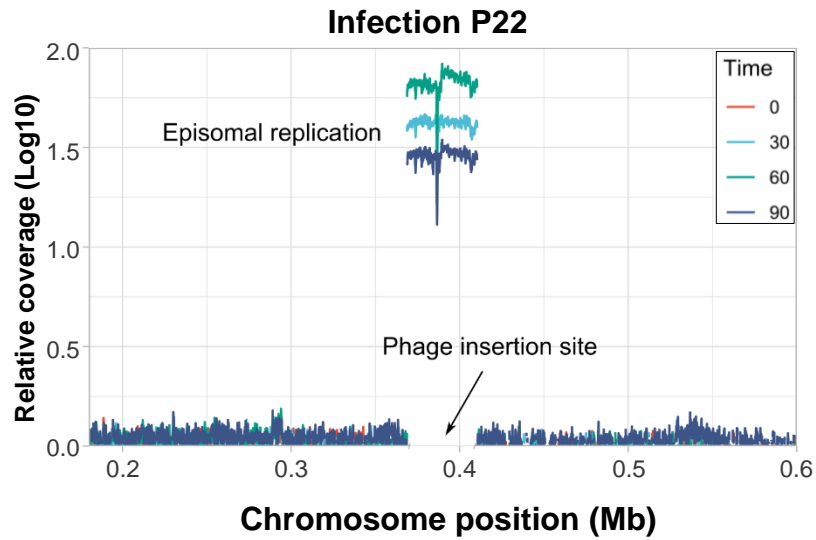

**Figure S4. Phage P22 replicates extra-chromosomally after infection.**

The relative abundance of phage genomic DNA and the chromosomal regions proximal to where P22 integrates is represented. Samples were analyzed at 0 (red), 30 (cyan), 60 (green), and 90 min (blue) after phage P22 infection. Relative coverage is the DNA relative to the average bacterial genomic coverage (excluding phage).



**a****qPCR excision**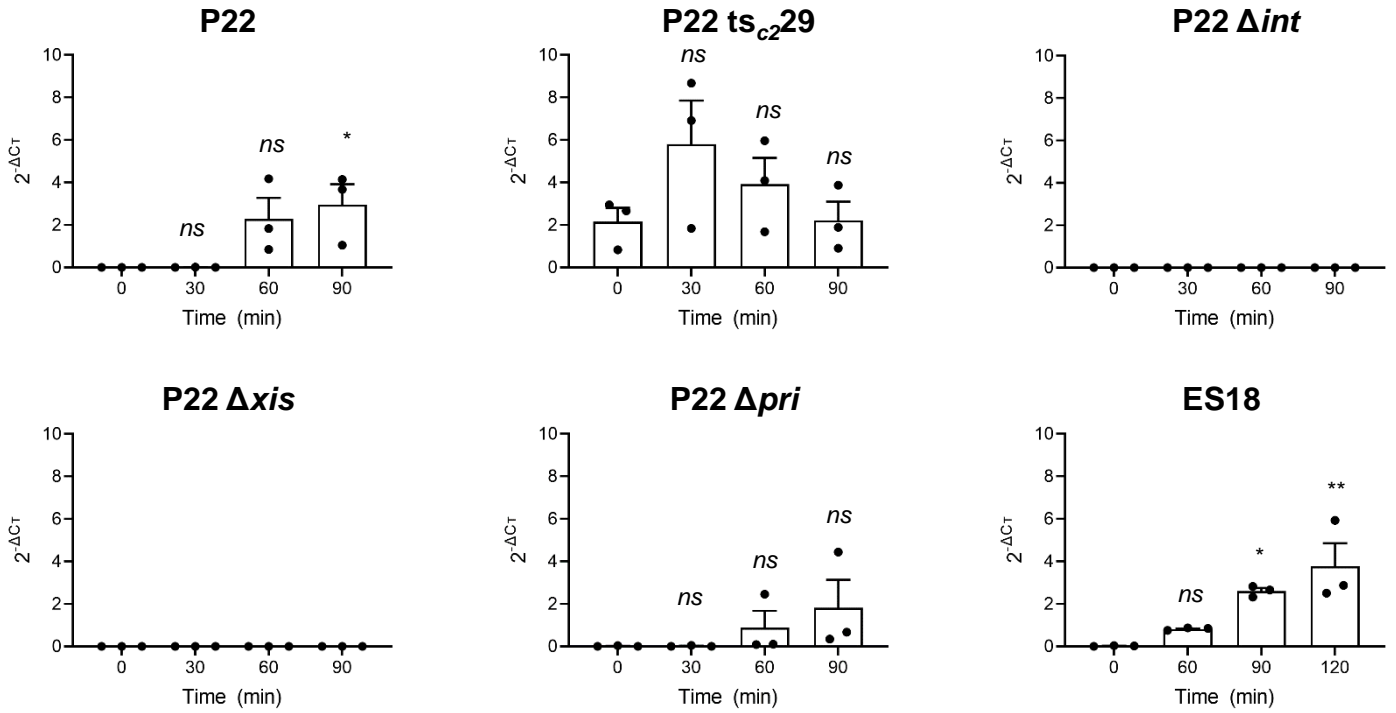**b****qPCR circularisation**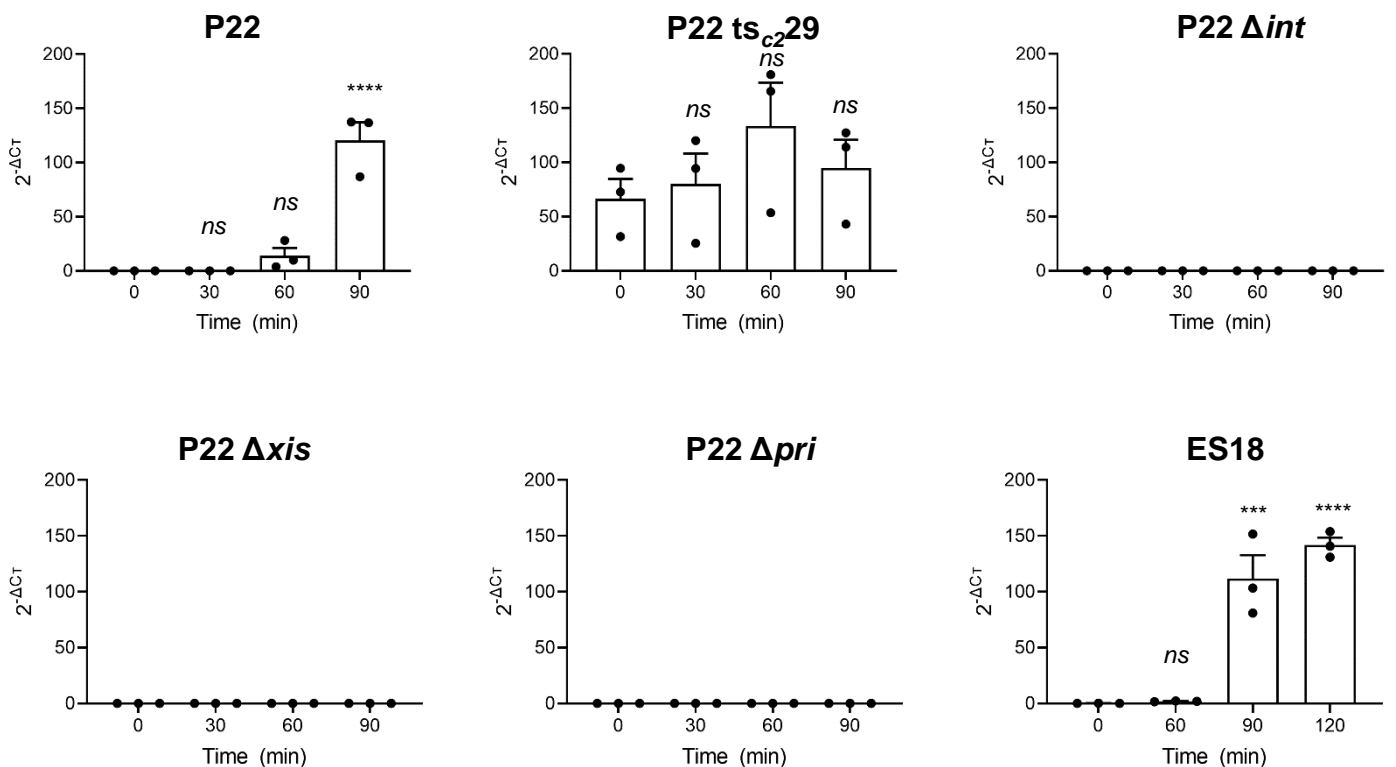**Figure S5. qPCR verification of the strains used in WGS**

Analysis of the excision (**a**) or circularisation (**b**) of the different prophages after MC induction, using qPCR. Samples were analysed at 0, 30, 60, and 90 min after induction of the wt or mutants P22 prophages, or at 0, 60, 90, and 120 min after induction of the ES18 prophage (using mitomycin C or temperature-shift, as appropriate). Relative gene expression levels were analyzed by using the  $2^{-\Delta CT}$  (where  $CT$  is threshold cycle). Error bars indicate standard deviation from the mean of three independent experiments. For all panels, values are means ( $n = 3$  independent samples). A one-way ANOVA with Dunnett's multiple comparisons test was performed to compare time 0 against the other timepoints. Adjusted p values were as follows:  $ns > 0.05$ ;  $*p \leq 0.05$ ;  $**p \leq 0.01$ ;  $***p \leq 0.001$ ;  $****p \leq 0.0001$ . The exact statistical values for each of the conditions tested are listed in Table S1.

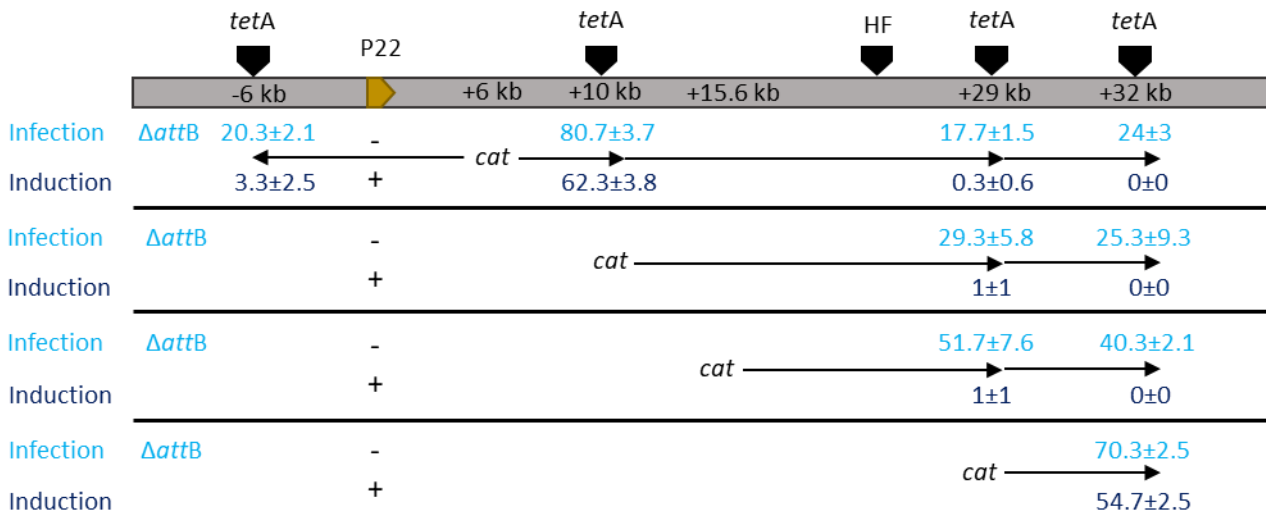

**Figure S6. Lateral transduction occurs by the headful mechanism.**

Co-transduction frequencies for strains containing both chloramphenicol (*cat*) and tetracycline (*tetA*) markers at varying distances apart. Lysates were tested for co-transduction of both markers by initially selecting for the *tetA* marker, with transductants subsequently scored for the *cat* marker. At least one hundred *tetA* transductants were tested from infection (cyan) or induction (blue) and the results are represented as a percentage (*cat/tetA*) x 100%. The *attB* for P22 is highlighted in orange and the headful limit (HF) is indicated. The + indicates a P22 lysogen (induction, LT), while the - indicates a non-lysogenic strain (infection, GT). The means and standard deviations from three independent experiments are presented ( $n=3$ ). Our results indicate that for lysates generated by P22 infection, all co-transduction frequencies were inversely proportional to their distance apart, even if they were located in two different headfuls, indicating that DNA packaging initiated at random sites. However, when we tested lysates generated by SOS induction, co-transduction was only observed for markers within a headful, indicating that packaging had primarily initiated from the bona fide *pac* site, and confirming that P22-mediated LT uses the headful mechanism for packaging.

**a**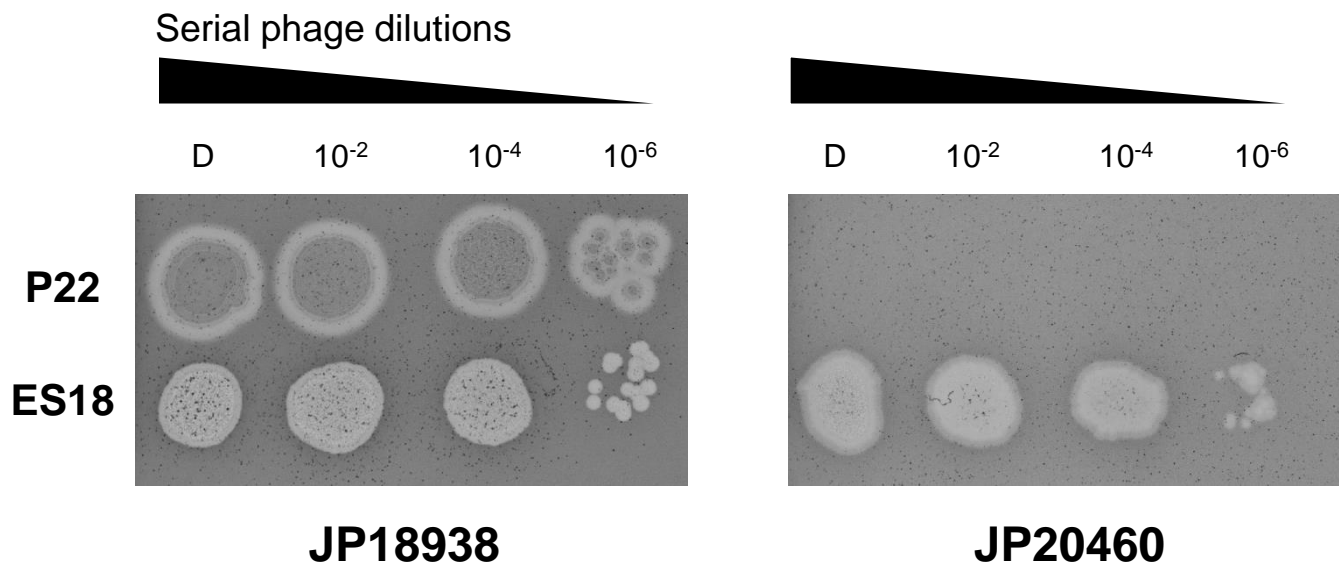**b**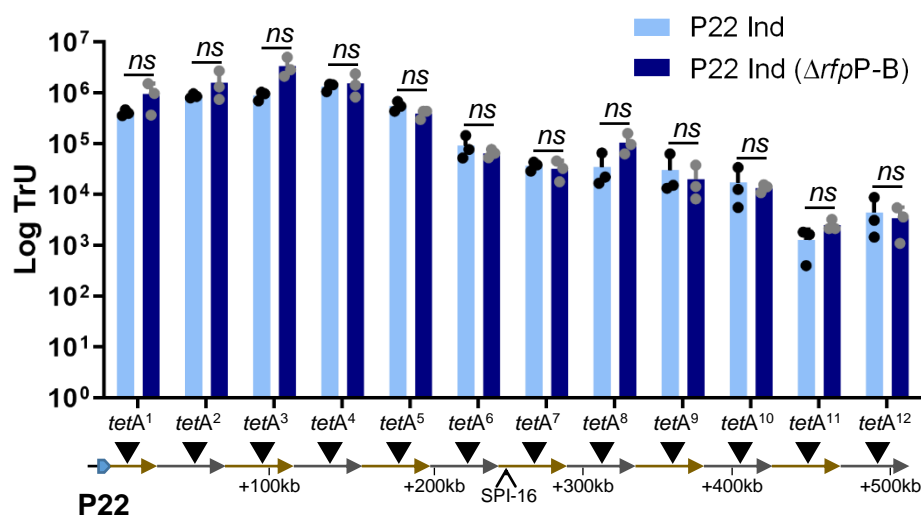

**Figure S7. Phage P22 engages in lateral transduction in an infection-resistant host.**

To rule out the possibility that P22 phages released early after SOS induction could superinfect the remaining cells to initiate packaging from the resident prophage genome, we deleted the *rfpP-B* genes that encode the P22 receptor and tested this strain for LT. **a**, Deletion of *rfpPB* renders LT2 insensitive to P22 infection. Serial dilutions of phages P22 and ES18 lysates were spotted onto lawns of non-lysogenic LT2 and non-lysogenic LT2  $\Delta rfpP-B$  strains. The presence of plaques indicates successful phage infection and replication via the lytic cycle. **b**, The transfer of tetracycline (*tetA*) markers located downstream of the P22 *attB* site, in twelve successive capsid headfuls (*tetA*<sup>n</sup>), was tested after P22 induction (Ind) in either wild type LT2 or LT2 lacking the phage P22 receptor ( $\Delta rfpP-B$ ). Transduction units (TrU) per milliliter were normalized by PFU per milliliter and represented as the log TrU of an average phage titre ( $1 \times 10^9$  PFU). Error bars indicate standard deviation from the mean of three independent experiments. For all panels, values are means ( $n = 3$  independent samples). An unpaired t test two-sided was performed to compare mean differences of infection and induction in each marker. Adjusted p values were as follows: *ns*>0.05; \* $p \leq 0.05$ ; \*\* $p \leq 0.01$ ; \*\*\* $p \leq 0.001$ ; \*\*\*\* $p \leq 0.0001$ . The exact statistical values for each of the conditions tested are listed in Table S1.

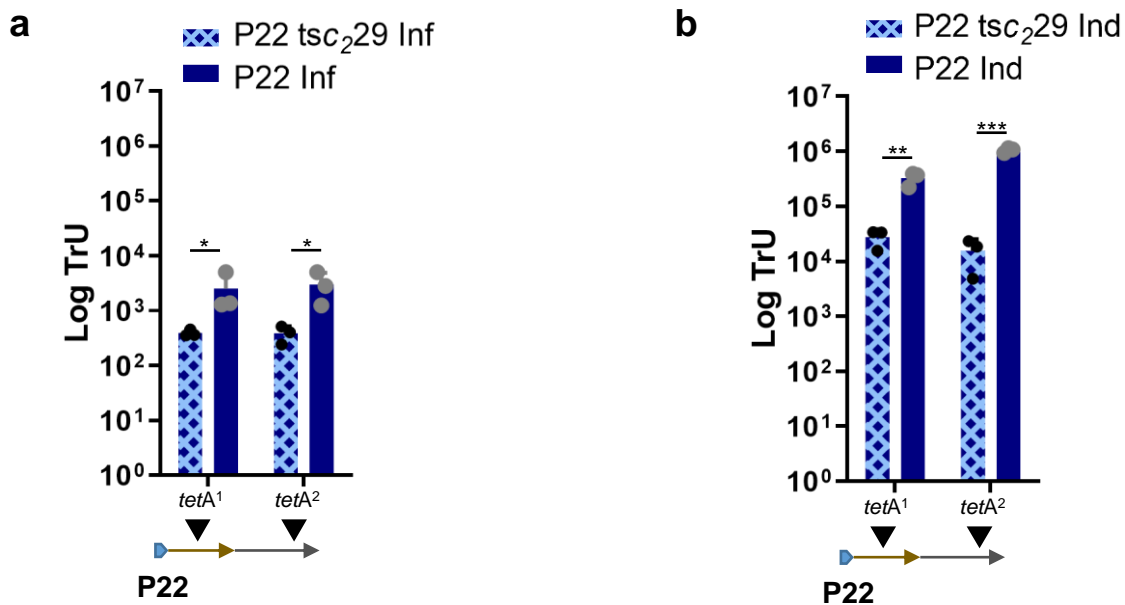

**Figure S8. P22 tsc<sub>29</sub> early excision produces low levels of lateral transduction.**

**a**, The transfer by GT of the two first tetracycline (*tetA*) markers located downstream of the P22 *attB* site was compared for both P22 and P22 tsc<sub>29</sub> after phage infection (Inf). **b**, The transfer of the two first *tetA* markers located downstream of the P22 *attB* site was compared for both the P22 and the P22 tsc<sub>29</sub> prophages following induction (Ind). Transduction units (TrU) per milliliter were normalized by PFU per milliliter and represented as the log TrU of an average phage titre (1 x 10<sup>9</sup> PFU). Error bars indicate standard deviation from the mean of three independent experiments. For all panels, values are means (n = 3 independent samples). An unpaired t test two-sided was performed to compare mean differences of infection and induction in each marker. Adjusted p values were as follows: ns>0.05; \*p≤0.05; \*\*p≤0.01; \*\*\*p≤0.001; \*\*\*\*p≤0.0001. The exact statistical values for each of the conditions tested are listed on Table S1.

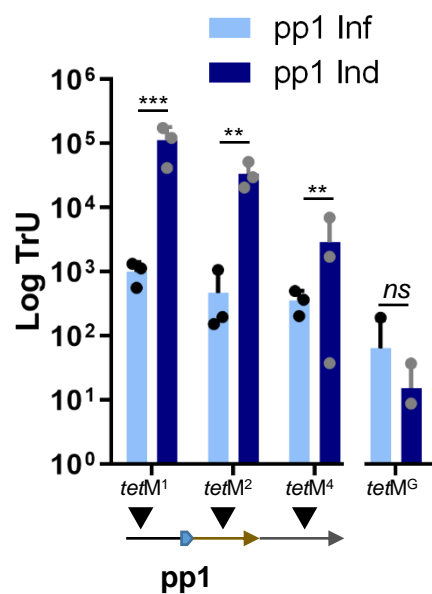

**Figure S9. Enterococcal phage pp1 engages in lateral transduction.**

The ability of phage pp1 to mobilise tetracycline (*tetM*) markers located downstream of the pp1 *attB* site in successive capsid headfuls ( $tetM^{n^1}$ ), or from non-phage associated regions of the chromosome ( $tetM^G$ ), was tested following induction (Ind) and infection (Inf). Transduction units (TrU) per milliliter were normalized by PFU per milliliter and represented as the log TrU of an average phage titre ( $1 \times 10^9$  PFU). Error bars indicate standard deviation from the mean of three independent experiments. Values are means ( $n = 3$  independent samples). An unpaired t test two-sided was performed to compare mean differences of infection and induction in each marker. Adjusted p values were as follows: *ns*>0.05; \* $p \leq 0.05$ ; \*\* $p \leq 0.01$ ; \*\*\* $p \leq 0.001$ ; \*\*\*\* $p \leq 0.0001$ . The exact statistical values for each of the conditions tested are listed in Table S1.

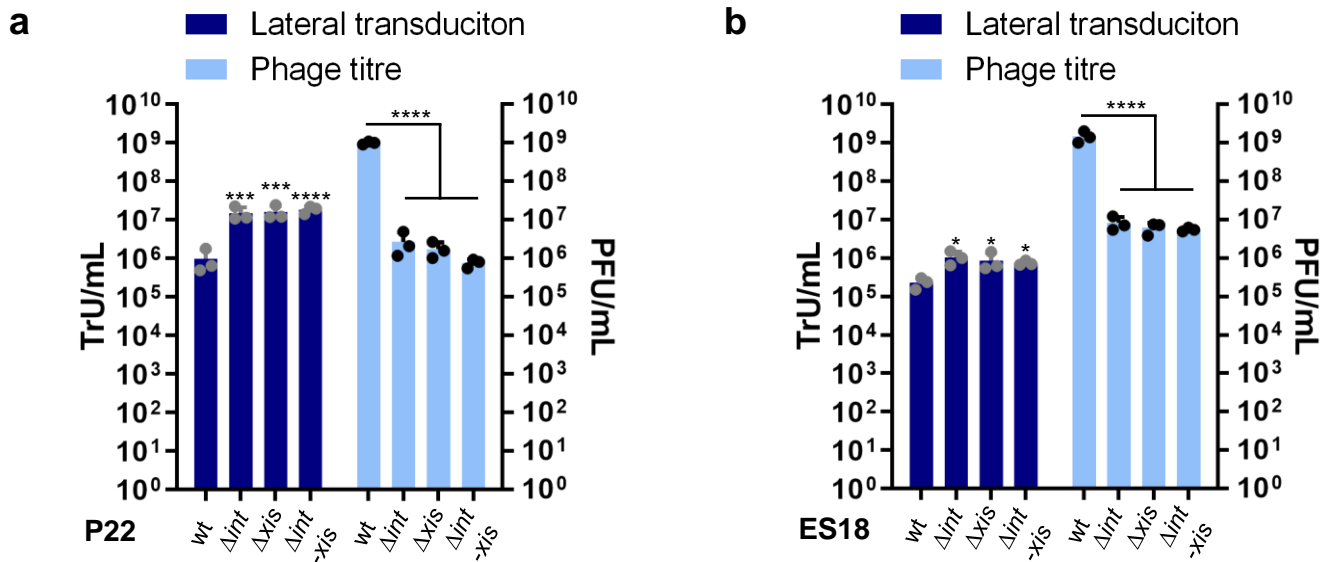

**Figure S10. Effect of phage mutations on lateral transduction and phage formation.**

**a**, P22 or P22-derivative ( $\Delta int$ ,  $\Delta xis$  or  $\Delta int-xis$ ) prophages were mitomycin C induced and tested for their ability to transduce a *tetA* marker (TrU/ml) and produce viable phage particles (PFU/ml). **b**, The same experiment was performed using phage ES18 or ES18-derivates ( $\Delta int$ ,  $\Delta xis$  or  $\Delta int-xis$ ). The means and standard deviations from three independent experiments are presented ( $n=3$ ). A one-way ANOVA with Dunnett's multiple comparisons test was performed to compare mean differences between time WT and derivatives phages. Adjusted p values were as follows:  $ns>0.05$ ;  $*p\leq 0.05$ ;  $**p\leq 0.01$ ;  $***p\leq 0.001$ ;  $****p\leq 0.0001$ . The exact statistical values for each of the conditions tested are listed in Table S1.

## References

1. Monk, I. R., Shah, I. M., Xu, M., Tan, M.-W. & Foster, T. J. Transforming the untransformable: application of direct transformation to manipulate genetically *Staphylococcus aureus* and *Staphylococcus epidermidis*. *MBio* **3**, (2012).
2. Matos, R. C. *et al.* *Enterococcus faecalis* prophage dynamics and contributions to pathogenic traits. *PLoS Genet.* **9**, e1003539 (2013).
3. Datsenko, K. A. & Wanner, B. L. One-step inactivation of chromosomal genes in *Escherichia coli* K-12 using PCR products. *Proc. Natl. Acad. Sci. U.S.A.* **97**, 6640–6645 (2000).
4. Guzman, L. M., Belin, D., Carson, M. J. & Beckwith, J. Tight regulation, modulation, and high-level expression by vectors containing the arabinose PBAD promoter. *J. Bacteriol.* **177**, 4121–4130 (1995).
5. Carpena, N., Manning, K. A., Dokland, T., Marina, A. & Penadés, J. R. Convergent evolution of pathogenicity islands in helper *cos* phage interference. *Philos. Trans. R. Soc. Lond., B, Biol. Sci.* **371**, 20150505 (2016).
6. Charpentier, E. *et al.* Novel cassette-based shuttle vector system for gram-positive bacteria. *Appl. Environ. Microbiol.* **70**, 6076–6085 (2004).
